# Supplementary material
Source: publisher site journal article supplement (https://www.dovepress.com/article/603039)
Supplement: Supplementary file 1 [file 603039%20Supplementary%20Material.pdf]

# Supplementary Figure 1

## Preliminary Research Title:

### *“Assessing Patients’ Educational Needs: Knowledge Gaps and Preferences for Receiving Information in Dermatology Clinics”*

This study is conducted by Principal Investigator Dr. Fawwaz Frieih, Department of Dermatology, College of Medicine, University of Hail, Saudi Arabia.

## Eligibility and Consent:

Please confirm that you are a Saudi adult aged 18 years or older for research purposes:

- Yes, I confirm
- No, I do not confirm

Please choose your preferred language for the questionnaire:

- Arabic
- English

---

## Questionnaire

**Q1\ Before answering the following questions, do you consent to participate in the following study?**

- Yes
- No

**Q2\ Gender**

- Male
- Female

**Q3\ Age**

- 18 to <20 years
- 20–30 years
- 30–40 years
- 40–50 years
- 50–60 years
- 60 years and above

**Q4\ Level of education**

- No formal education
- Primary education
- Secondary education
- High school education
- Bachelor’s degree
- Master’s degree

**Q5\ Location of residence in Saudi Arabia**

- Northern region
- Western region
- Middle region
- Eastern region
- Southern region

**Q6\ Have you visited a dermatology clinic before?**

- Yes
- No

**Q7\ How often do you visit a dermatology clinic?**

- Only had one visit before
- Once a year
- 2–3 times a year
- More than 3 times a year

**Q8\ Of the listed most common skin conditions, which condition do you suffer from if any? (Select all that apply; if your condition is not mentioned, please type it in the other section)**

- Eczema
- Acne
- Psoriasis
- Rosacea
- Warts
- Skin malignancy
- Skin infection
- I do not have any condition
- Other: \_\_\_\_\_

**Q9\ Have you ever been confused or misunderstood any aspect of your skin condition or treatment plan after it has been explained to you?**

- Yes, often
- Yes, occasionally

- Rarely
- Never

**Q10\ How would you rate your current understanding of your skin condition? Rate it on a scale from 1 to 5 (1 being very poor to 5 being very good)**

- 1
- 2
- 3
- 4
- 5

**Q11\ Do you think the complexity of a specific skin condition may have played a negative role in your understanding of it?**

- Yes
- No
- Maybe

**Q12\ How satisfied are you with the information provided to you by your dermatologist regarding your condition?**

- Very satisfied
- Satisfied
- Neutral
- Unsatisfied
- Strongly unsatisfied

**Q13\ What obstacles do you face during clinic visits that may affect your understanding of the skin condition and its treatment? (Select all that apply)**

- Lack of time during consultations
- Anxiety or fear to ask about the condition and if it is serious
- Language barriers
- The doctor seems busy and occupied
- Medical terminology is too complex
- I do not face any barriers
- Other: \_\_\_\_\_

**Q14\ What medical aspects of your skin condition do you feel least informed about? (Select all that apply; if not mentioned, please specify in other)**

- Diagnosis
- Causes and risk factors
- Treatment options
- Medication usage
- Prevention and lifestyle measures
- Potential side effects or complications
- None, I feel well informed
- Other: \_\_\_\_\_

**Q15\ Which language do you prefer your provider to communicate with you in regarding your skin condition?**

- Arabic, I understand it better
- English, as most information online and names of skin conditions would mostly be known to me in English
- I do not mind either

**Q16\ Have you ever sought information about your skin condition outside your clinic visit because you felt confused or information provided was not enough?**

- Yes
- No

**Q17\ If yes, where do you typically seek information? (Select all that apply)**

- Online (social media, websites, etc.)
- Books or pamphlets
- People around me (family and friends)
- Support groups with a similar condition (in person or online)
- Other: \_\_\_\_\_

**Q18\ How do you prefer to receive information about your skin condition? (Rank your choices in order of preference from 1 to 6)**

- Face-to-face consultations with a dermatologist
- Printed materials (pamphlets, flyers)
- Digital material in written form (websites, Twitter)
- Video platforms (YouTube, TikTok)
- Group sessions (online or in-person)
- Other: \_\_\_\_\_

**Q19\ If you chose (other) in the previous question, please specify:**

.....  
 .....

**Q20\ What type of aspects do you find most helpful during your visit, or believe if it were present would improve patient understanding? (Select all that apply)**

- Step-by-step guides for managing your condition
- More time spent with the dermatologist each visit
- Visual aids provided in the clinic (3D skin model, picture diagram)
- Patients' success stories or case study examples

- Research updates and new treatment options available
- Contact information for additional support (e.g., nurse hotline, support groups)
- Availability of a patient educator to provide any further explanations and support
- Closure summaries provided by the doctor at the end of the visit
- Other: \_\_\_\_\_

**Q21\ Do you feel that your dermatologist takes enough time to answer your questions and explain your condition?**

- Yes, always
- Yes, most times
- Sometimes
- Rarely
- Never

**Q22\ How often would you like to be informed if there are any updates about your skin condition?**

- At every visit
- Once a month
- Once every 3 months
- Only when there are significant changes in treatment or condition
- I do not care to be informed

**Q23\ What improvements would you suggest for improving patient education in dermatology clinics?**

.....  
 .....

**Q24\ Would you be interested in participating in educational workshops or webinars hosted by your clinic, if they asked you to help other patients and improve awareness?**

- Yes
- No
- Maybe

**Q25\ Would you be willing to give feedback on the educational materials provided to help improve them?**

- Yes
- No
